# Supplementary material
Source: PubMed Central journal article supplement (PMC3094764)
Supplement: NIHMS284209-supplement-1.pdf [file NIHMS284209-supplement-1.pdf]

**SUPPLEMENTAL MATERIAL**

**Lack of primary cilia primes shear-induced Endothelial-to-Mesenchymal Transition**

Surname first author: Egorova

Short title: Role of primary cilia in shear induced EndoMT

Anastasia D. Egorova<sup>1</sup> MSc, Padmini P.S.J. Khedoe<sup>1</sup> MSc, Marie-José T.H. Goumans<sup>2</sup> PhD, Bradley K. Yoder<sup>3</sup> PhD, Surya M. Nauli<sup>4</sup> PhD, Peter ten Dijke<sup>2</sup> PhD, Robert E. Poelmann<sup>1</sup> PhD, Beerend P. Hierck<sup>1</sup> PhD

<sup>1</sup>Departments of Anatomy and Embryology, Leiden University Medical Center, The Netherlands; <sup>2</sup>Molecular Cell Biology and Center for Biomedical Genetics, Leiden University Medical Center, The Netherlands; <sup>3</sup>Department of Cell Biology, University of Alabama at Birmingham, Birmingham, Alabama, USA; <sup>4</sup>Pharmacology and Medicine, College of Pharmacy and Medicine, University of Toledo, Ohio, OH, USA

Corresponding author:

Beerend P. Hierck, PhD

Dept. of Anatomy and Embryology, Leiden University Medical Center

P.O. Box 9600, Postzone S-1-P, 2300 RC Leiden, The Netherlands

tel: +31 71 5269309

fax: +31 71 5268289

email: [B.P.Hierck@LUMC.nl](mailto:B.P.Hierck@LUMC.nl)

Total word count: 2017

Total number of figures: 3

Total number of tables: 1

## METHODS

### Cell culture and supplements

Generation of mouse embryonic wild type EC (WT) and mouse embryonic EC with a mutation in the *Tg737* gene (IFT88Tg737RPW or *Tg737<sup>orp/ork</sup>*) from the Oak Ridge Polycystic Kidney mouse was previously described<sup>1</sup>. Cells were passaged twice a week and maintained on 1% w/v gelatin (Merck, Darmstadt, Germany) in advanced DMEM medium (Invitrogen, Breda, the Netherlands) supplemented with 4.5 g/L D-glucose (Invitrogen), 110 mg/L sodium pyruvate (Invitrogen), non-essential amino acids (Invitrogen), 2% (v/v) heat inactivated Fetal Calf Serum (Sigma-Aldrich Chemie, Steinheim, Germany), 0.5% (v/v) antibiotic/ antimyotic solution (Invitrogen), 1% (v/v) insulin, transferin, selenium supplement (Invitrogen), and 2mM L-glutamine (Invitrogen). For some of the experiments, the culture medium was supplemented with Tgf $\beta$ 3 (1ng/ml), Tgf $\beta$  neutralizing antibody ( $\alpha$ -Tgf $\beta$ , 2G7 IgG2b, 10ug/ml)<sup>2</sup>, Alk5 kinase inhibitor SB431542 (10 $\mu$ mol/L in DMSO; Tocris)<sup>3</sup>, or DMSO (Sigma).

### Shear stress exposure

For the shear stress experiments, WT and *Tg737<sup>orp/ork</sup>* EC were seeded on fixed 1% (w/v) gelatin coated coverslips and grown to confluence. EC were subjected to 0.5 and 2.5 Pa shear stress for 2 or 24 hours at 37°C and 5% CO<sub>2</sub> in a re-circulation parallel plate flow system as previously reported<sup>4</sup>. Responses of shear-exposed cells were compared to those of static cultures. To block Alk5 kinase activity during exposure to shear stress, cells were pre-incubated with SB431542 for 1 hour and then exposed to shear stress in medium supplemented with the compound at the same concentration. 0.1% (v/v) DMSO (Sigma) served as a sham for the SB431542 experiments. To neutralize functional Tgf $\beta$  either present in the medium or produced by the cells during exposure to shear stress, cells were pre-incubated with a pan-Tgf $\beta$  neutralizing antibody for 1 hour prior to shear exposure in the presence of antibody in equal concentration. Static controls were treated identically with the omission of flow. Directly following incubation or exposure to flow, cells were fixed for immunofluorescence analysis (n=3) or lysed for RNA (n=4) or protein (n=3) isolation. Hoffman modulation contrast images were taken using Nikon Eclipse Ti inverted microscope system (20x and 40x objectives).

### Constructs and transfection

The Ift88\*/*Tg737* expression construct encodes the Ift88 protein (90 kDa) and a 28kDa tag (mCherry, denoted by an asterisk (\*)). *Tg737<sup>orp/ork</sup>* EC were transfected with Lipofectamine (Invitrogen) according to the manufacturer's protocol. Stable cell lines were generated by drug selection using 500  $\mu$ g/ml G418 (Invitrogen) to obtain *Tg737<sup>orp/ork</sup>*-Ift88\*. Expression from the Ift88\* construct was evaluated using Q-PCR and Western Blot analysis and compared to *Tg737<sup>orp/ork</sup>* cells which were stably transfected with pEGFP-N1 (Clontech R&D, Palo Alto, USA), which served as control.

Full length mouse *Klf4* cDNA was amplified by PCR using F:5'-CCCACATTAATGAGGCAGC-3' and R:5'-GGTCACATCCACTACGTGG-3' primers and cloned under the regulatory control of the human cytomegalovirus (CMV) immediate early promoter/enhancer into pcDNA3.3 (Invitrogen). Cells were transfected 24 hours prior to the start of experiments using Lipofectamine to obtain *Tg737<sup>orp/ork</sup>*-*Klf4*. All experiments were performed in quadruplicate (n=4). pcDNA3.3-LacZ (Invitrogen) served as control.

### Immunocytochemistry

Cells were fixed with 4% paraformaldehyde in 0.1mol/L phosphate buffer (pH7.4) for 10 min at room temperature. Permeabilized cells were incubated with antibody against acetylated  $\alpha$ -tubulin (6-11B-1, 1:2000, Sigma) and  $\alpha$ SMA (1A4, 1:1000, Sigma) for 3 hours at 37°C, followed by incubation with FITC-labeled rabbit-anti-mouse antiserum (1:100, DAKO). For the CD31

staining, cells were incubated overnight with PECAM-1 antibody (M-20, 1:100, Santa Cruz), followed by incubation with biotin-labeled swine-anti-rabbit antiserum (1:100, DAKO) and FITC conjugated avidin (1:100, Vector labs). DAPI (1:1000, Invitrogen) was used for nuclear counterstaining and cells were mounted in ProLong Gold (Molecular Probes). Confocal scanning was performed using a Leica SP5 confocal scanning laser microscope (63x and 100x oil immersion objectives). ImageJ and Photoshop 10.0 were used for processing the data.

### Q-PCR

Total RNA was isolated (RNeasy, Qiagen) and was treated with DNase-I (Qiagen) according to the manufacturer's protocol. IScript cDNA synthesis kit (Bio-Rad) was used to reverse transcribe 500ng of RNA into cDNA. Real-time Q-PCR was performed using iQ SYBR Green Supermix (Bio-rad) in a Mx3000 real-time thermocycler (Stratagene) as described<sup>5</sup>. The reaction mixture consisted of the following: 1x PCR Master Mix, 1 $\mu$ l cDNA template, and 10 pmol of each specific primer. Gene specific primers are listed in Online Table I. The PCR program consisted of a hot start activation step, followed by 50 cycles of 30 seconds at 95°C, 60 seconds annealing at 58°C, and 30 seconds extension at 72°C. Dissociation analysis was performed in all reactions to exclude the presence of primer-dimers and confirm the amplification of unique targets. No-template controls were used as negative controls. Relative expression levels were normalized to the housekeeping gene *GAPDH* to compensate for the differences in RNA input.

### Western Blotting

Western blot analysis was performed as described<sup>6</sup>. Protein samples were separated on a 8% SDS polyacrylamide gel, transferred onto a nitrocellulose membrane (Hybond P; Amersham Pharmacia Biotech), and incubated overnight at 4°C with antibody against CD31 (M-20, 1:500, Santa Cruz), Klf4 (ab34814, 1:700, Abcam), Ift88 (Polaris B1700, 1:5000)<sup>7</sup>, phospho-Smad2 (138D4, 1:1000, Cell Signaling) and GAPDH (6C5, 1:5000, Millipore). The blots were then incubated with peroxidase-conjugated anti-rabbit (CD31, Klf4, Ift88, phospho-Smad2) and anti-mouse (GAPDH) secondary antibody (1:1000; GE Healthcare), and developed using the ECL Plus Western blotting detection system (Thermo Scientific). Signals were quantified using densitometry and normalized to GAPDH. Western Blots shown in the Figures are representative of 3 independent experiments.

### Mice

The Oak Ridge Polycystic Kidney (Tg737<sup>orp/ork</sup>) animals were generated by a transgene insertion mutagenesis as described previously<sup>8</sup> and lines were maintained as heterozygous crosses on an inbred FVB/N genetic background. Animals were treated and maintained in accordance with the Institutional Animal Care and Use Committee regulations at the University of Alabama at Birmingham. Genotyping was performed as described previously<sup>9</sup>. E11.5 embryos were fixed overnight in 4% paraformaldehyde in 0.1 mol/L phosphate buffer (pH7.4) and routinely processed for paraffin immunohistochemical analysis. Specimens were sectioned transversely through the heart at 10 $\mu$ m.

### Immunohistochemistry

After deparaffination and rehydration of the sections, microwave antigen retrieval was applied by heating the slides for 12 min to 98°C in citric acid buffer (0.01M in aqua-dest, pH6.0). Inhibition of endogenous peroxidase was performed after which the sections were incubated overnight with anti-phospho-Smad2 antibodies (138D4, 1:100 in PBS, Cell Signaling) and anti- $\alpha$ SMA antibodies (1A4, 1:3000 in 1%BSA/PBST, Sigma-Aldrich Chemie). Slides were rinsed in PBS and incubated with the secondary antibodies for 1 hour at room temperature: for phospho-Smad2 with biotin conjugated goat-anti-rabbit secondary antibodies (1:200 in PBS/1.5% NGS, Vector Laboratories) and for  $\alpha$ SMA with horseradish peroxidase conjugated rabbit-anti-mouse antibodies

(1:250 in 1%BSA/PBST, DAKO). Subsequently phospho-Smad2 stained slides were incubated with ABC-reagent (Vector Laboratories) for 45 min and all the slides were visualized with 400ug/ml 3-3'di-aminobenzidin tetrahydrochloride (DAB, Sigma-Aldrich Chemie). The slides were then dehydrated and mounted with Entellan (Merck). All the slides were processed simultaneously and Tg737<sup>orp<sup>k</sup>/orp<sup>k</sup></sup> embryos (n=3) were compared with wild type littermates (n=4).

#### **Statistical Analysis**

For comparison of the means, independent experiments were performed and analyzed using SPSS 14.0 (SPSS Inc.). All results are expressed as mean  $\pm$  SEM. Independent t-tests, including Levene's analyses for equality of variances, were used to analyze differences between groups. Values of  $P < 0.05$  and a power  $\geq 0.80$  were considered statistically significant and are marked by an asterisk (\*) in the figures.

## FIGURES AND FIGURE LEGENDS

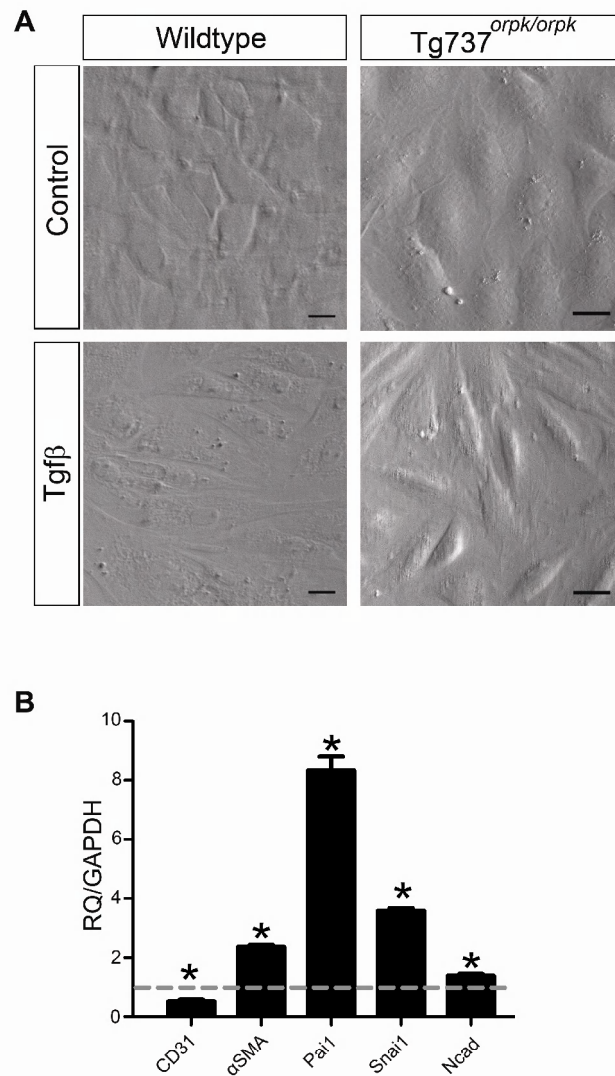**Online Figure I. Tgfb induced EndoMT in ciliated WT and non-ciliated Tg737<sup>orp/orp</sup> EC.**

(A) Morphology of WT and Tg737<sup>orp/orp</sup> cells which were stimulated with Tgfb ligand to induce EndoMT under static conditions. Note the transition from cobble-stone to fibroblast-like morphology upon stimulation with Tgfb. Scale bars: 25  $\mu$ m. (B) Relative mRNA expression of *CD31*,  *$\alpha$ SMA*, *Pai1*, *Snai1*, and *Ncad* in WT EC upon stimulation with Tgfb ligand. Expression is normalized to *GAPDH* and relative to shams, as represented by the dashed line.

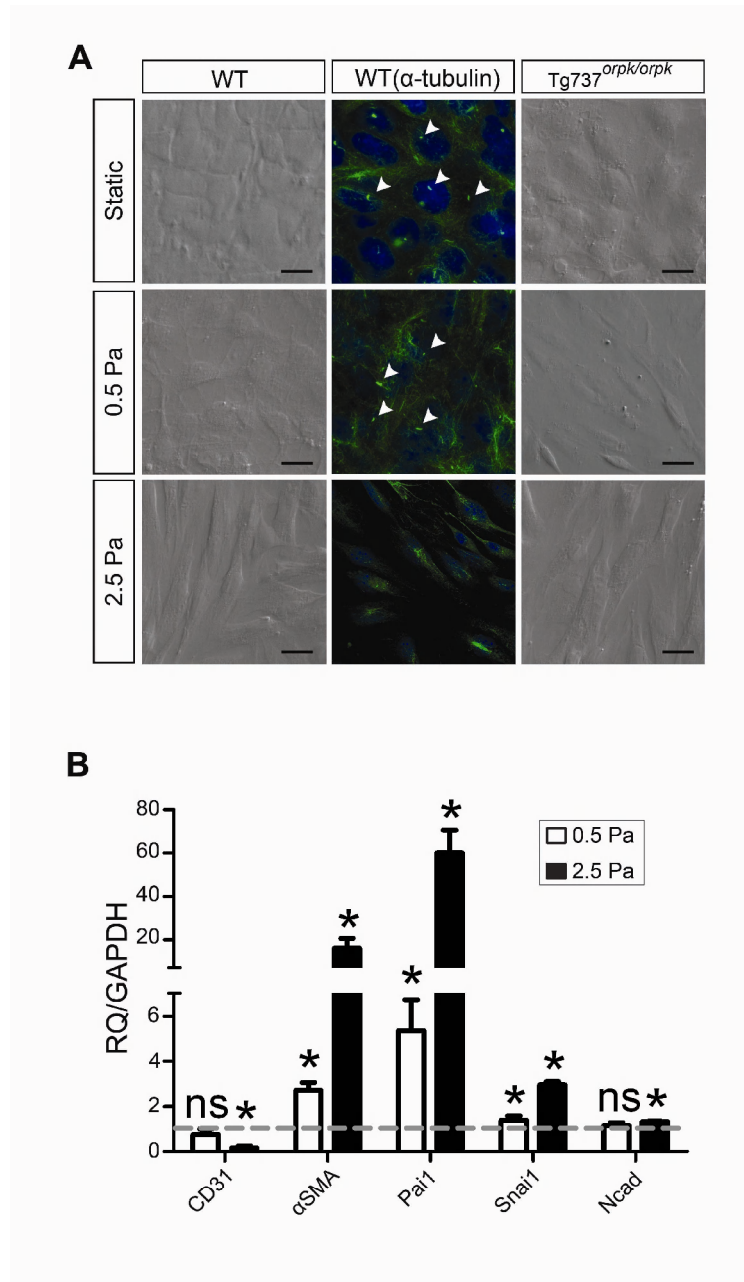

**Online Figure II. WT EC loses their cilia and undergo EndoMT after exposure to high flow.**

(A) Morphology of WT (left and middle column) and Tg737<sup>orpk/orpk</sup> cells (right column) under static conditions (top row) and after exposure to 0.5 and 2.5 Pa shear stress (middle and lower rows, respectively). The central column shows immunostaining for acetylated  $\alpha$ -tubulin. Arrowheads indicate cilia. Note the presence of primary cilia at 0.5 Pa shear and the non-ciliated phenotype of WT cells after exposure to 2.5 Pa shear stress. Scale bars: 25  $\mu$ m. (B) Relative mRNA expression of *CD31*,  *$\alpha$ SMA*, *Pai1*, *Snai1*, and *Ncad* in WT cells under 0.5 and 2.5 Pa shear. Expression is normalized to *GAPDH* and relative to static shams, as represented by the dashed line.

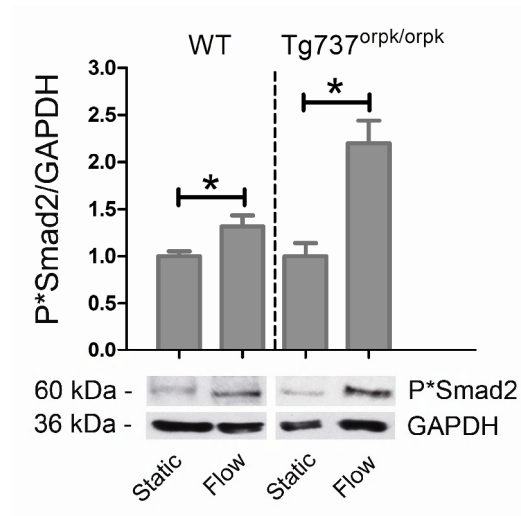

**Online Figure III. Exposure to shear stress results in enhanced phospho-Smad2 expression in Tg737<sup>orp/orp</sup> cells.**

Western Blot analysis and quantification of P\*Smad2 protein levels in WT and Tg737<sup>orp/orp</sup> cells under static conditions and after exposure to 2 hours of 0.5 Pa shear stress. Western Blot shown is representative of 3 independent experiments.

## TABLES

Online Table I. List of Q-PCR primers used.

| Gene of interest                  | Gene ID | Oligonucleotide sequence                                       |
|-----------------------------------|---------|----------------------------------------------------------------|
| <i>muActa2</i> ( $\alpha$ SMA)    | 11475   | F: 5'-CATCATGCGTCTGGACTTG-3'<br>R: 5'-ATCTCACGCTCGGCAGTAG-3'   |
| <i>muCD31</i>                     | 18613   | F: 5'-CTCCAACAGAGCCAGCAGTA-3'<br>R: 5'-GACCACTCCAATGACAACCA-3' |
| <i>muGAPDH</i>                    | 14433   | F: 5'-TTGATGGCAACAATCTCCAC-3'<br>R: 5'-CGTCCCGTAGACAAAATGGT-3' |
| <i>muIrf88</i>                    | 21821   | F: 5'-GCAAATGGAACGTGAAAGG-3'<br>R: 5'-AAGACGCTTCGATCACAGG-3'   |
| <i>muKlf2</i>                     | 16598   | F: 5'-ATTGCAACTGGGAAGGATG-3'<br>R: 5'-GTGGCACTGAAAGGGTCT G-3'  |
| <i>muKlf4</i>                     | 16600   | F: 5'-CAGGCGAGAAACCTTACCA-3'<br>R: 5'-TGTGTGTTTGCGGTAGTGC-3'   |
| <i>muCdh2</i> ( <i>Ncad</i> )     | 12558   | F: 5'-AATCCCACTTATGGCCTTTC-3'<br>R: 5'-AGGATTTGGGGCAAATAAG-3'  |
| <i>muSerpine1</i> ( <i>Pai1</i> ) | 18787   | F: 5'-GCCAACAAGAGCCAATCAC-3'<br>R: 5'-ACCCTTTCCCAGAGACCAG-3'   |
| <i>muSnai1</i>                    | 20613   | F: 5'-CTTGTGTCTGCACGACCTG-3'<br>R: 5'-CAGTGGGAGCAGGAGAAT-3'    |



### REFERENCE LIST

1. Nauli SM, Kawanabe Y, Kaminski JJ, Pearce WJ, Ingber DE, Zhou J. Endothelial cilia are fluid-shear sensors that regulate calcium signaling and nitric oxide production through polycystin-1. *Circulation*. 2008;117:1161-1171.
2. Arteaga CL, Hurd SD, Winnier AR, Johnson MD, Fendly BM, Forbes JT. Anti-transforming growth factor (TGF)-beta antibodies inhibit breast cancer cell tumorigenicity and increase mouse spleen natural killer cell activity. Implications for a possible role of tumor cell/host TGF-beta interactions in human breast cancer progression. *J Clin Invest*. 1993;92:2569-2576.
3. Inman GJ, Nicolas FJ, Callahan JF, Harling JD, Gaster LM, Reith AD, Laping NJ, Hill CS. SB-431542 is a potent and specific inhibitor of transforming growth factor- $\beta$  superfamily type I activin receptor-like kinase (ALK) receptors ALK4, ALK5, and ALK7. *Mol Pharmacol*. 2002;62:65-74.
4. Hierck BP, Van der Heiden K, Alkemade FE, van de Pas S, van Thienen JV, Groenendijk BCW, Bax WH, Van der Laarse A, DeRuiter MC, Horrevoets AJG, Poelmann RE. Primary Cilia Sensitize Endothelial Cells for Fluid Shear Stress. *Dev Dyn*. 2008;237:725-735.
5. Hierck BP, Molin DGM, Boot MJ, Poelmann RE, Gittenberger-de Groot AC. A chicken model for DGCR6 as a modifier gene in the DiGeorge critical region. *Pediatr Res*. 2004;56:440-448.
6. Goumans MJ, Valdimarsdottir G, Itoh S, Rosendahl A, Sideras P, ten Dijke P. Balancing the activation state of the endothelium via two distinct TGF $\beta$  type I receptors. *EMBO J*. 2002;21:1743-1753.
7. Haycraft CJ, Zhang Q, Song B, Jackson WS, Detloff PJ, Serra R, Yoder BK. Intraflagellar transport is essential for endochondral bone formation. *Development*. 2007;134:307-316.
8. Moyer JH, Lee-Tischler MJ, Kwon HY, Schrick JJ, Avner ED, Sweeney WE, Godfrey VL, Cacheiro NL, Wilkinson JE, Woychik RP. Candidate gene associated with a mutation causing recessive polycystic kidney disease in mice. *Science*. 1994;264:1329-1333.
9. Yoder BK, Richards WG, Sommardahl C, Sweeney WE, Michaud EJ, Wilkinson JE, Avner ED, Woychik RP. Differential rescue of the renal and hepatic disease in an autosomal recessive polycystic kidney disease mouse mutant. A new model to study the liver lesion. *Am J Pathol*. 1997;150:2231-2241.
